# Poly(I:C) Enhances the Susceptibility of Leukemic Cells to NK Cell Cytotoxicity and Phagocytosis by DC

Eva Lion<sup>1\*</sup>, Sébastien Anguille<sup>1</sup>, Zwi N. Berneman<sup>1,2</sup>, Evelien L. J. M. Smits<sup>1</sup>, Viggo F. I. Van Tendeloo<sup>1,2</sup>

**1** Vaccine & Infectious Disease Institute (Vaxinfecio), Laboratory of Experimental Hematology, Faculty of Medicine, University of Antwerp, Antwerp, Belgium, **2** Center for Cellular Therapy and Regenerative Medicine, Antwerp University Hospital, Antwerp, Belgium

## Abstract

α Active specific immunotherapy aims at stimulating the host's immune system to recognize and eradicate malignant cells. The concomitant activation of dendritic cells (DC) and natural killer (NK) cells is an attractive modality for immune-based therapies. Inducing immunogenic cell death to facilitate tumor cell recognition and phagocytosis by neighbouring immune cells is of utmost importance for guiding the outcome of the immune response. We previously reported that acute myeloid leukemic (AML) cells in response to electroporation with the synthetic dsRNA analogue poly(I:C) exert myeloid immunogenicity, demonstrated by enhanced DC-activating and NK cell interferon-γ-inducing capacities. To further invigorate the potential of these immunogenic tumor cells, we explored their effect on the phagocytic and cytotoxic capacity of DC and NK cells, respectively. Using single-cell analysis, we assessed these functionalities in two- and three-party cocultures. Following poly(I:C) electroporation AML cells become highly susceptible to NK cell-mediated killing and phagocytosis by DC. Moreover, the enhanced killing and the improved uptake are strongly correlated. Interestingly, tumor cell killing, but not phagocytosis, is further enhanced in three-party cocultures provided that these tumor cells were upfront electroporated with poly(I:C). Altogether, poly(I:C)-electroporated AML cells potently activate DC and NK cell functions and stimulate NK-DC cross-talk in terms of tumor cell killing. These data strongly support the use of poly(I:C) as a cancer vaccine component, providing a way to overcome immune evasion by leukemic cells.

**Citation:** Lion E, Anguille S, Berneman ZN, Smits ELJM, Van Tendeloo VFI (2011) Poly(I:C) Enhances the Susceptibility of Leukemic Cells to NK Cell Cytotoxicity and Phagocytosis by DC. PLoS ONE 6(6): e20952. doi:10.1371/journal.pone.0020952

**Editor:** Jacques Zimmer, Centre de Recherche Public de la Santé (CRP-Santé), Luxembourg

**Received:** May 9, 2011; **Accepted:** May 13, 2011; **Published:** June 17, 2011

**Copyright:** © 2011 Lion et al. This is an open-access article distributed under the terms of the Creative Commons Attribution License, which permits unrestricted use, distribution, and reproduction in any medium, provided the original author and source are credited.

**Funding:** This work was supported in part by research grants of the Fund for Scientific Research - Flanders (FWO-Vlaanderen, G.0370.08 and G.0082.08), the Foundation Against Cancer (Stichting tegen Kanker), the Antwerp University Concerted Research Action (BOF-GOA, grant no. 802), the Methusalem financement program of the Flemish Government to the Antwerp University and the Interuniversity Attraction Poles financement programme (IAP #P6/41) of the Belgian Government. EL was funded by a PhD grant of the Institute for the Promotion of Innovation through Science and Technology in Flanders (IWT-Vlaanderen) and supported by a Stichting Emmanuel van der Schueren research grant of the Vlaamse Liga tegen Kanker (VLK). SA is a PhD fellow of the Fund for Scientific Research, Flanders (FWO-Vlaanderen). ES was funded as postdoctoral researcher by the Fund for Scientific Research. No additional external funding received for this study. The funders had no role in study design, data collection and analysis, decision to publish, or preparation of the manuscript.

**Competing Interests:** The authors have declared that no competing interests exist.

\* E-mail: eva.lion@ua.ac.be

## Introduction

Active specific immunotherapy (ASI) for cancer aims at stimulating the host's immune system to recognize and eradicate tumor cells. Despite a sound conceptual basis and the observation of tangible clinical effects in some patients, cancer vaccination studies have so far shown only modest clinical benefit. To move the field forward, researchers are currently exploring new approaches to amend the therapeutic potential of ASI approaches. Over time it has become clear that combined therapies are likely to be the most successful in the fight against cancer. In this regard, there is strong interest in simultaneous targeting of multiple immune cells of the host's anti-tumor immunity on one hand and the immunogenic properties of the tumor cell compartment on the other hand [1]. In particular, concomitant activation of dendritic cells (DC) and natural killer (NK) cells and the promotion of NK-DC cross-talk is currently an attractive modality for ASI [2-4]. Dendritic cells are the key orchestrators of the immune system, bridging innate and adaptive immunity. Through uptake of dying cells, DC navigate the immune response to tolerance or immunity to antigens [5]. One of the challenges in the design of cancer vaccines is the promotion of the processing of exogenous tumor

antigens by DC and the subsequent antigen presentation to specific CD8<sup>+</sup> T cells (i.e. cross-presentation [6,7]). In this context, exposure of DC to danger signals is crucial for their activation and the development of an efficient T helper type 1 (Th1)-mediated cellular immune response, desirable in cancer immune-based therapies [8]. Natural killer cells, as central players of the innate immune system, currently evoke a reinvigorated interest for their potential in ASI [9-11]. The direct anti-tumor effects of NK cells can be ascribed to their cytotoxic and cytokine-secreting capacity. Additionally, NK cells can also indirectly contribute to tumor control by communicating with DC and other immune cells, supporting the development of an efficient adaptive anti-tumor immune response [2,12].

In light of cranking up the immunogenic properties of the tumor cells, the induction of immunogenic cell death has been shown to be of utmost importance in guiding the outcome of the triggered immune response [5,13]. Tumor cell death can be induced in various ways, such as irradiation, hyperthermia, drug/chemical-induced, freeze-thawing, oncolytic virus infection, Toll-like receptor (TLR) signaling, or combinations of the above mentioned. For certain methods, dying immunogenic tumor cells were shown to be efficiently cross-presented via DC, exerting strong

anti-tumor responses *in vitro* [14–24] and *in vivo* [23,25–27]. Importantly, activation of NK cells and sensitization of tumor cells to NK cell-mediated killing can contribute to improved tumor cell death [10,11,28]. NK cell functions are regulated by a balance of activating and inhibiting signals [29]. Cancer cell resistance mechanisms against NK cell cytotoxicity have been described for several tumors [10,11]. In this respect, creating an NK cell stimulatory environment through induction of activating NK cell receptors or of their respective ligands expressed by tumor cells [28,30–33], reducing inhibitory signalling [34,35], or stimulating antibody-dependent cell-mediated cytotoxicity [36,37] is currently under intense investigation.

Here, we developed an *in vitro* model to dissect the effect of dsRNA-modified acute myeloid leukemic (AML) tumor cell lines upon interaction with primary human NK cells and autologous monocyte-derived immature DC. While current standard therapies for AML can successfully induce remission, the disease is characterized by a high probability of relapse and refractory disease that shorten the survival of AML patients. Evidence of both innate and adaptive immune surveillance and the existence of immune escape mechanisms of the low immunogenic AML cells warrants the application of immune-based strategies to control persisting AML cells [38,39]. An important observation in patients with AML is the impairment of functional NK cell responses due to a primary NK cell dysfunction, both in the cytotoxic and cytokine producing compartments, and due to the development of NK cell resistance mechanisms by AML cells [32,40–46]. ASI for AML aiming at improvement of recognition by both innate and adaptive immunity and overcoming immune resistance mechanisms is therefore recommended.

Many studies have highlighted the potential role of the synthetic dsRNA analogue polyriboinosinic polyribocytidylic acid (poly(I:C)), as a critical cancer vaccine component as it was shown to exert several anti-tumor functions through its adjuvant effects. Poly(I:C) is an agonist of the innate endosomal TLR3 and the cytosolic melanoma differentiation-antigen-5 (mda-5) receptors [47]. It is a well-described danger signal able to trigger cell death and induce the production of proinflammatory cytokines, including type I interferons (IFN), in various cell types [47–53]. Under defined conditions, poly(I:C) is a powerful NK cell activation signal [47,52,54–60] and it has been shown to efficiently activate and mature DC [61–66] and stimulate DC-NK cell interactions [55,67,68]. The synthetic dsRNA was also demonstrated to directly [16,69–71] and indirectly [72–75] promote cross-presentation of antigens by DC, however, a recent study reported an opposite inhibitory effect on cross-presentation [76]. Of note, different mouse *in vivo* studies demonstrated that tumor cell-associated poly(I:C) induced strong anti-tumor activity. Treatment with dsRNA-associated tumor cells inhibited tumor growth, increased the number of tumor-infiltrating lymphocytes and enhanced the survival of tumor-bearing mice [72,77].

We have previously reported that AML cells in response to electroporation with poly(I:C) show improved tumor cell immunogenicity, demonstrated by an enhanced capacity to activate and mature DC [53] and induce the release of NK cell IFN- $\gamma$  [78]. Ensuing from these data, in this study, we examined the effect of poly(I:C)-electroporated AML cells on the phagocytic capacity of immature DC and on the cytotoxic function of NK cells. Using single-cell analysis, we assessed these functionalities in two- and three-party cocultures and checked for type I and II IFN secretion. We demonstrate *in vitro*, an enhanced sensitivity to NK cell-mediated killing and an improved uptake by DC of poly(I:C)-electroporated tumor cells.

## Materials and Methods

### Purification of human NK cells and generation of immature DC

Peripheral blood mononuclear cells (PBMC) were isolated by Ficoll-Paque Plus gradient separation (Amersham Biosciences, Uppsala, Sweden) from fresh heparinised (BD, Plymouth, UK) blood or buffy coat preparations (kindly provided by the Antwerp Blood Transfusion Centre) from healthy donors. Ethics approval for the study was obtained from the Ethics Committee of the Antwerp University Hospital. For experiments with three-party cocultures (DC + NK cells + tumor cells) two consecutive blood draws (day 0 and day 5) per healthy donor were taken, for purification of CD14<sup>+</sup> monocytes and NK cells, respectively. Two-party cocultures (DC + tumor cells or NK cells + tumor cells) were performed with cell material generated from buffy coat preparations. Purified resting CD56<sup>+</sup>CD3<sup>-</sup> NK cells were obtained from the PBMC or CD14-negative peripheral blood lymphocyte fraction by using the human negative selection NK cell isolation kit (Miltenyi Biotec, Utrecht, The Netherlands) according to the manufacturer's instructions. NK cells were analysed on a Partec CyFlow ML cytometer (Partec, Münster, Germany), using FITC-, PE- or APC-labeled monoclonal antibodies for CD56 and CD3 (BD Biosciences, Erembodegem, Belgium). Routinely, a purity of 91.2 $\pm$ 5.1 % (mean  $\pm$  SD %, n = 8) viable CD56<sup>+</sup>CD3<sup>-</sup> NK cells was obtained, without contamination with CD3<sup>+</sup> T cells. Monocytes were purified from PBMC by immunomagnetic cell selection with CD14 microbeads (Miltenyi Biotec). Subsequently, CD14 positively selected cells (mean purity of 95.8 $\pm$ 2.3 %, n = 14) were used for the *in vitro* generation of immature DC. Monocytes were resuspended in RPMI 1640 culture medium (BioWhittaker, Verviers, Belgium) supplemented with 2.5% heat-inactivated human AB (hAB) serum (Sigma-Aldrich, Bornem, Belgium) and seeded in 6-well culture plates (Corning Life Sciences, Schiphol-Rijk, The Netherlands) at a final concentration of 1-1.2 $\times$ 10<sup>6</sup> cells/mL for 5 days with 800 IU/mL (60 ng/mL) GM-CSF (Gentaur, Brussels, Belgium) and 20 ng/mL IL-4 (Immunotools, Friesoythe, Germany).

### Human cell lines

The human NK-sensitive K562 (chronic myelogenous leukemia in blast crisis) and U-937 (acute myeloid monocytic leukemia) cell lines were used as target cells. Both cell lines were obtained from the American Type Culture Collection (Rockville, MD, USA) and cultured in complete medium consisting of Iscove's modified Dulbecco's medium (IMDM; Lonza, Verviers, Belgium) with L-glutamine (584 mg/L) and 4-(2-hydroxy-ethyl)-1-piperazineethanesulfonic acid (HEPES; 25 mM) supplemented with gentamicin (10 mg/L; Invitrogen, Merelbeke, Belgium), amphotericin B (1 mg/L Fungizone; Invitrogen) and 10% fetal bovine serum (FBS; Perbio Science, Erembodegem, Belgium). The human NK cell line NK92 (Deutsche Sammlung von Mikroorganismen und Zellkulturen, Braunschweig, Germany) for use as positive control in cytotoxicity assays was cultured in MEM alpha medium + GlutaMAX-I (Invitrogen) supplemented with gentamicin and amphotericin B, 12.5% FBS, 12.5% donor equine serum (horse serum, HS; HyClone, Utah, USA) and 100–200 U/mL IL-2 (Invitrogen). All cell lines were maintained in logarithmic phase growth at 37°C in a humidified atmosphere supplemented with 5% CO<sub>2</sub>.

### Fluorescent labeling of tumor cells and DC prior to coculture

In order to simultaneously acquire NK cell cytotoxicity and DC phagocytosis of tumor cells by flow cytometry, NK cells were kept

unlabeled, tumor cells were labeled with the green-fluorescent membrane dye PKH67 (Sigma-Aldrich) and DC were stained with cytoplasmic violet-fluorescent CellTracker Violet BMQC dye (Invitrogen). Labeling of tumor cells with PKH67 was carried out according to the manufacturer's instructions and performed prior to electroporation without loss of fluorescence. Briefly, after one wash in serum-free medium,  $10 \times 10^6$  tumor cells per mL Diluent C (provided in kit) were rapidly and homogeneously mixed with  $2 \mu\text{M}$  PKH67 dye at room temperature for 5 min. The staining reaction was stopped with FBS (100 %) for 1 min and diluted with an equal volume of IMDM medium with 10% FBS. PKH67-labeled cells were washed three times and checked for fluorescence intensity and viability using propidium iodide (PI; Sigma-Aldrich). Labeled tumor cells were electroporated the same day or were kept in culture at  $0.5 \times 10^6$  cells/mL up to the next day for electroporation, without loss of fluorescence and viability. A novel protocol for labeling of DC with CellTracker Violet BMQC was developed by us for use in flow cytometry. The violet dye was brought to a stock concentration of 10 mM with dimethyl sulphoxide (DMSO; Sigma-Aldrich) and diluted with serum-free RPMI medium to a working solution of  $5 \mu\text{M}$ . DC were labeled at  $1 \times 10^6$  cells per mL pre-heated working solution at  $37^\circ\text{C}$ . After 30 min incubation, cells were washed and resuspended in RPMI medium with 2.5% hAB serum for an additional 30 min incubation at  $37^\circ\text{C}$ . Finally, cells were washed twice and checked for viability and labeling efficiency.

#### Electroporation of AML cell lines with poly(I:C)

Electroporation of poly(I:C) (Invivogen, Paris, France) was performed as described previously [78]. PKH67-labeled tumor cells were washed twice in serum-free IMDM culture medium and Opti-MEM I medium (Invitrogen) and were resuspended in

Opti-MEM I. Subsequently, 0.2 mL of cell suspension was transferred to a 0.4 cm cuvette (Cell Projects, Harrietham, UK) and mixed with  $20 \mu\text{g}$  poly(I:C). Electroporation was performed using a GenePulser Xcell device (BioRad, Nazareth, Belgium) at predefined settings (300 V, 7 ms). Immediately after electroporation cells were transferred to serum-containing medium and washed twice to remove excess of poly(I:C). Finally, tumor cells were resuspended in IMDM supplemented with 10% FBS or RPMI medium with 2.5% hAB serum, dependent on the experimental setup. Electroporated tumor cells were allowed to rest for 2-4 hours prior to coculture.

#### *In vitro* cocultures

Freshly purified resting NK cells and/or autologous immature DC were put in coculture with mock- (without poly(I:C)) or poly(I:C)-electroporated tumor cells at an effector:target (E:T) cell ratio of 1:1 for two-party and 1:1:1 for three-party cocultures ( $0.2 \times 10^6$  cells per cell type) in a final volume of 600  $\mu\text{L}$  in sterile polypropylene tubes (Greiner bio-one, Menen, Belgium). When DC were added, cocultures were always held in RPMI medium supplemented with 2.5% hAB. In absence of DC, cells were cultured in RPMI with 2.5% hAB or IMDM medium with 10% FBS. After overnight coculture (mean duration of  $16.4 \pm 1.6$  h,  $n=12$ ) at  $37^\circ\text{C}$ , tubes were centrifuged and supernatant was collected and stored at  $-20^\circ\text{C}$  for future analysis. Cell pellets were immediately used for flow cytometric detection of cytotoxicity and phagocytosis.

#### Flow cytometric detection of NK cell-mediated cytotoxicity and phagocytosis

Overnight cocultures were stained for cell death with annexin V (APC-conjugated; BD Biosciences) in annexin V binding buffer (BD

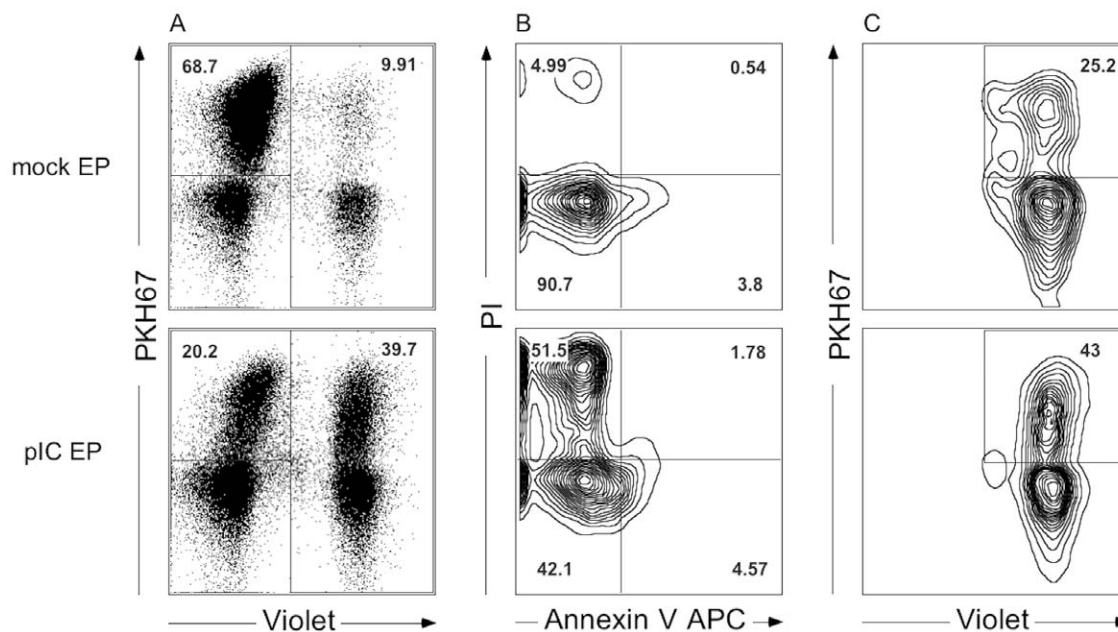

**Figure 1. Simultaneous flow cytometric detection of NK cell cytotoxicity and DC phagocytosis of tumor cells.** Plots show the flow cytometric analysis of three-party cocultures of NK cells + DC with mock-electroporated tumor cells (upper panel) and with poly(I:C)-electroporated tumor cells (lower panel). (A) Target cells labeled with PKH67 dye (upper left gate), DC labeled with CellTracker Violet BMQC dye (right gate) and unlabeled NK cells (lower left corner) can be explicitly discriminated. After exclusion of doublets (FSC-area versus FSC-width), (B) viability (annexin V<sup>-</sup> PI<sup>-</sup>, lower left quadrant) of PKH67<sup>+</sup> tumor cells (A, upper left gate) can be determined and used for calculating the % killing. (C) Phagocytosis of PKH67<sup>+</sup> tumor cells by violet-labeled DC is expressed as the % PKH67<sup>+</sup>violet<sup>+</sup> cells within the violet<sup>+</sup> DC population (A, right gate), selected for single cells. Abbreviations: mock EP, electroporated without poly(I:C); pIC EP, electroporated with poly(I:C). doi:10.1371/journal.pone.0020952.g001

Biosciences) and PI. Acquisition was performed on a Partec CyFlow ML (Partec) or a FACSAria II (BD Biosciences) multicolor cytometer. Usually, 20 000 PKH67<sup>+</sup> cells per sample were acquired. Flow cytometric data analysis was performed using FlowJo version 8.8.6 (Treestar, Ashland, USA). Figure 1 shows an example of gating strategy for determination of NK cell cytotoxicity and DC phagocytosis of tumor cells. The first gate was always put on single cells based on the forward scatter (FSC)-Area versus FSC-Width scatter profile. Cytotoxicity was determined based on the viability (annexin V<sup>-</sup> PI<sup>-</sup>) of PKH67<sup>+</sup> target cells. The percentage killing was calculated taking into account the viability of mock- or poly(I:C)-electroporated tumor cells after culture with NK cells and/or DC, relative to respectively mock- or poly(I:C)-electroporated tumor cells cultured alone. Results are depicted using the following equation: % killing = 100 – [(% annexin V<sup>-</sup> PI<sup>-</sup> tumor cells with effector cells / % annexin V<sup>-</sup> PI<sup>-</sup> tumor cells without effector cells) × 100]. For each experiment, the human NK cell line NK92 was stimulated with mock-electroporated tumor cells and IL-2 (Invitrogen) as a positive control of the killing assay. Phagocytosis of PKH67<sup>+</sup> tumor cells by violet-labeled DC was expressed as the % PKH67<sup>+</sup>violet<sup>+</sup> cells within the violet<sup>+</sup> DC population. Parallel to cocultures at 37°C, negative controls at 4°C were carried out.

### Cytokine secretion profile

Secretion of IFN- $\alpha$  and IFN- $\gamma$  in supernatant of overnight cocultures was determined using a multiplex FlowCytomix kit (Bender MedSystems, Vienna, Austria) according to the manufacturer's instructions. Flow cytometric detection of cytokines was assessed at once in thawed non-diluted supernatant. Standard curves of each analyte reached a top concentration of 20 000 pg/mL. All samples were acquired on a FACScan cytometer (BD Biosciences, San Jose, CA, USA) and data were analysed using FlowCytomix Pro 2.3 software (Bender MedSystems).

### Statistical analysis

GraphPad Prism 5.0 software (GraphPad Software, San Diego, USA) was used for graphical data representations and statistical computations. Statistical analysis was performed using a paired non-parametric Wilcoxon Signed-Rank test or Spearman rank correlation test, where appropriate. P-value <0.05 was considered statistically significant.

## Results

### dsRNA transfection of AML cells enhances their susceptibility to NK cell-mediated killing

Previously, we showed that AML cells in response to poly(I:C) loading by electroporation become apoptotic and secrete IFN- $\alpha$  [53]. Through secretion of type I IFN, they are able to trigger substantial NK cell IFN- $\gamma$  release without the need of additional triggering signals [78]. In this study, we investigated the effect of these dsRNA-modified AML cells on the cytotoxic function of NK cells and hypothesized that poly(I:C)-induced apoptosis would increase the sensitivity to NK cell-mediated killing. Poly(I:C)-induced apoptosis was determined for each electroporation. Table 1 depicts the viability, defined as the percentage annexin V-negative and PI-negative cells, of K562 and U-937 cells upon mock and poly(I:C) electroporation after overnight culture with or without effector cells. Mock-electroporated K562 (n = 10) and U-937 (n = 12) cell lines remained viable for 82.1 ± 7.3% and 88.4 ± 8.9% (mean ± SD), respectively. Viability of poly(I:C)-electroporated K562 cells was lowered to 59.2 ± 21.3%, whereas

**Table 1. Viability (% annexin V<sup>-</sup> PI<sup>-</sup>) of mock- and poly(I:C)-electroporated tumor cells after overnight culture with and without effector cells.**

| Effectors | K562        |             | U-937       |             |
|-----------|-------------|-------------|-------------|-------------|
|           | mock EP     | pIC EP      | mock EP     | pIC EP      |
| -         | 82.1 ± 7.3  | 59.2 ± 21.3 | 88.4 ± 8.9  | 31.8 ± 11.4 |
| NK        | 74.2 ± 10.5 | 42.0 ± 19.8 | 77.6 ± 14.4 | 20.4 ± 11.6 |
| NK+DC     | 76.5 ± 9.8  | 37.4 ± 19.2 | 71.5 ± 18.2 | 20.3 ± 12.9 |

Results are expressed as a mean value (n between 7 and 12) ± SD of the percentage annexin V<sup>-</sup> PI<sup>-</sup> PKH67<sup>+</sup> single cells after overnight culture at a ratio of 1:1 for NK + tumor cells and 1:1:1 for NK + DC + tumor cells.  
doi:10.1371/journal.pone.0020952.t001

U-937 cells became even more apoptotic with only 31.8 ± 11.4% remaining viable.

Presented in figure 2, overnight coculture of purified NK cells with mock-electroporated K562 or U-937 cells at an E:T ratio of 1:1 resulted in respectively 11 ± 8% (mean ± SD; n = 8) and 11 ± 10% (n = 8) killing. Non-electroporated tumor cells were killed by NK cells at a similar rate as to that of mock-electroporated tumor cells for the two cell lines (data not shown). Importantly, killing of poly(I:C)-electroporated target cells was significantly higher compared to mock-electroporated target cells (p = 0.009 for K562 and p < 0.001 for U-937). Poly(I:C)-electroporated K562 and U-937 cells were killed for 38 ± 22% and 42 ± 18% respectively. For each independent experiment, the cytotoxic NK cell line NK92 was cocultured with mock-electroporated target cells at an E:T ratio of 1:1 in the presence of IL-2 serving as a positive control. NK92 effector cells killed K562 cells for 56 ± 23% (n = 8) and U-937 cells for 70 ± 9% (n = 9), with a residual viability of 36.2 ± 18.1% and 27.1 ± 10.5%, respectively.

### Poly(I:C) electroporation of AML cells improves subsequent phagocytosis by DC

Poly(I:C)-electroporated AML cells are capable of stimulating immature DC as evidenced by an increased expression of major histocompatibility complex (MHC) and costimulatory molecules, production of proinflammatory cytokines and an increase of Th1-polarizing capacity [53]. Here, we examined if poly(I:C) electroporation of AML cells has an influence on their subsequent phagocytosis by immature DC.

As depicted in figure 3, flow cytometric analysis revealed that 19.9 ± 10.3% K562 mock-electroporated (mean ± SD; n = 9) and 25.2 ± 11.4% U-937 mock-electroporated (n = 14) tumor cells were phagocytosed by DC after overnight coculture at a 1:1 DC:tumor cell ratio. Uptake of non-electroporated tumor cells was similar to that of mock-electroporated tumor cells, for the two cell lines (data not shown). Interestingly, poly(I:C)-electroporated tumor cells were phagocytosed more efficiently than mock-electroporated tumor cells. A mean of 36.1 ± 21.9% poly(I:C)-electroporated K562 cells (range 10–70%, p = 0.009) and 38.9 ± 12.3% poly(I:C)-electroporated U-937 cells (range 12–55%, p < 0.001) was taken up by DC.

### Tumor cell killing but not phagocytosis by DC is improved in three-party cocultures

To examine functional cross-talk between NK cells and DC, we simultaneously examined the killing and phagocytosis of AML cell lines in coculture with NK cells and autologous

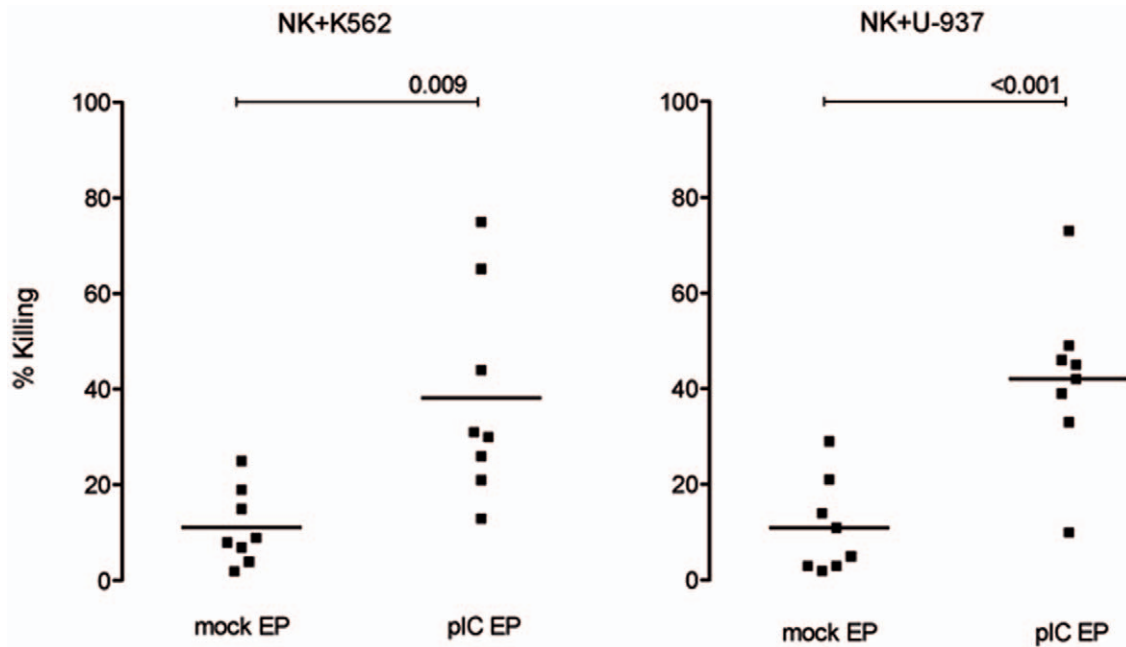

**Figure 2. Poly(I:C)-electroporated tumor cells are more susceptible to NK cell-mediated killing compared to mock-electroporated tumor cells.** Percentage killing of mock- and poly(I:C)-electroporated tumor cell lines K562 and U-937 by purified NK cells based on the viability (annexin V<sup>-</sup> PI<sup>-</sup>) of PKH67<sup>+</sup> target cells. Cocultures were kept overnight at a 1:1 NK:tumor cell ratio. Horizontal lines represent mean of 8 donors. Differences are statistically significant if  $p < 0.05$ . Abbreviations: mock EP, electroporated without poly(I:C); pIC EP, electroporated with poly(I:C).

doi:10.1371/journal.pone.0020952.g002

immature DC. Interestingly, the presence of DC in NK cell:K562 cell cocultures significantly improved tumor cell killing, provided that K562 cells were upfront electroporated with poly(I:C)

(figure 4;  $p = 0.32$  for mock-electroporated and  $p = 0.005$  for poly(I:C)-electroporated K562 cells). This effect was not significant for U-937 ( $p = 0.15$  for mock-electroporated and  $p = 0.46$  for

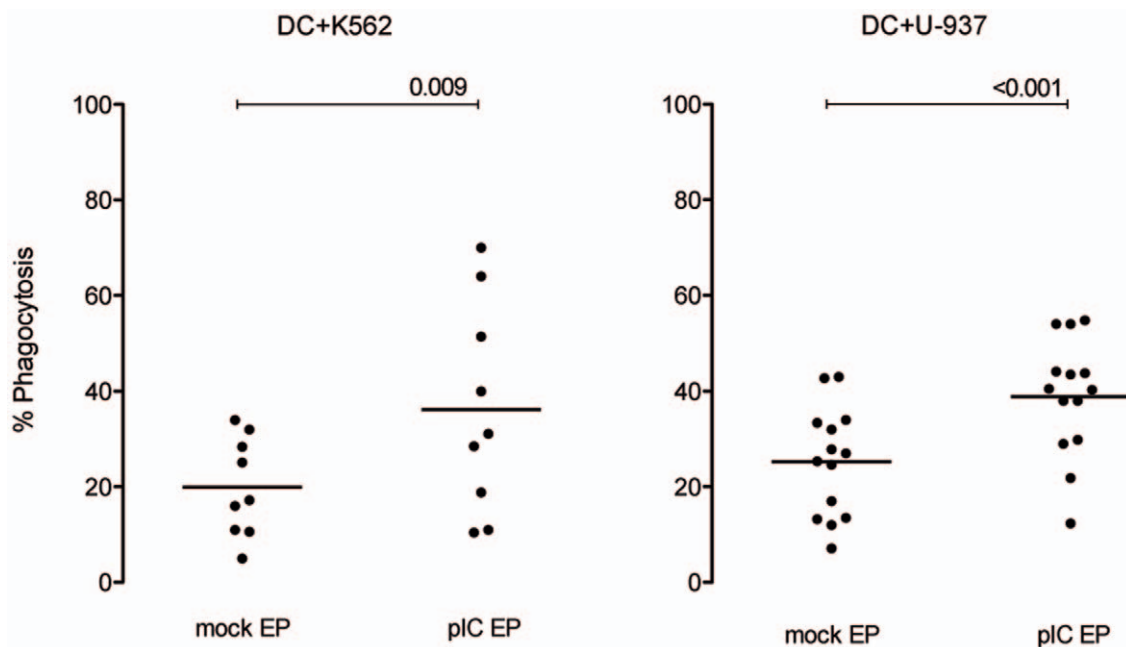

**Figure 3. Phagocytosis of poly(I:C)-electroporated tumor cells by DC is higher compared to mock-electroporated tumor cells.** Percentage phagocytosis of mock- and poly(I:C)-electroporated tumor cell lines K562 ( $n = 9$ ) and U-937 ( $n = 14$ ) by immature DC is shown. Phagocytosis is expressed as the percentage PKH67<sup>+</sup> DC within the violet<sup>+</sup> DC after overnight coculture at a 1:1 DC:tumor cell ratio. Horizontal lines represent means and differences are statistically significant if  $p < 0.05$ . Abbreviations: mock EP, electroporated without poly(I:C); pIC EP, electroporated with poly(I:C).

doi:10.1371/journal.pone.0020952.g003

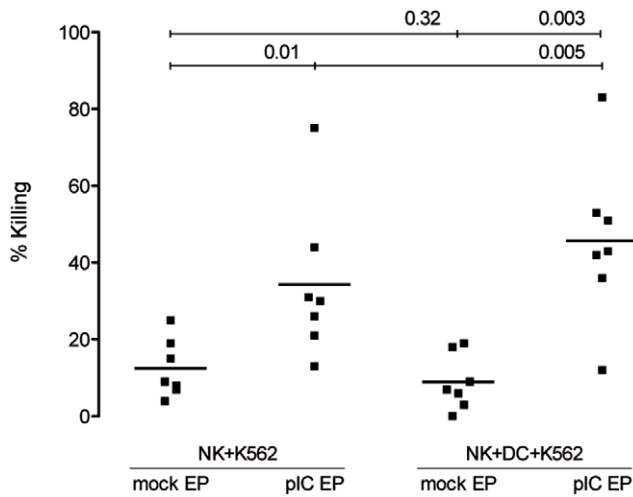

**Figure 4. Improved killing of K562 cells by NK cells in the presence of DC when K562 cells are sensitized with poly(I:C).** Percentage killing of mock- and poly(I:C)-electroporated K562 cells by NK cells or by NK cells and DC. Cocultures were kept overnight at a 1:1 NK:K562 or a 1:1:1 NK:DC:K562 cell ratio. Horizontal lines represent mean of 7 donors. Differences are statistically significant if  $p < 0.05$ . Abbreviations: mock EP, electroporated without poly(I:C); pI:C EP, electroporated with poly(I:C). doi:10.1371/journal.pone.0020952.g004

poly(I:C)-electroporated U-937 cells; data not shown). Next, we hypothesized that improved killing of poly(I:C)-electroporated tumor cells by NK cells could lead to an even higher uptake of apoptotic cells by DC. However, we could not see any improvement of phagocytosis of mock- nor poly(I:C)-electroporated tumor cells if NK cells were added to the coculture ( $p = 0.17$  and  $p = 0.26$  for K562 and  $p = 0.68$  and  $p = 0.09$  for U-937, respectively; data not shown).

#### U-937 cells secrete IFN- $\alpha$ upon poly(I:C) electroporation and induce secretion of NK cell IFN- $\gamma$

Concentrations of IFN- $\alpha$  and IFN- $\gamma$  were determined in non-diluted supernatant of overnight cocultures. Concomitant to our previous data [53,78], poly(I:C) electroporation of U-937 cells but not K562 cells, induced high levels of IFN- $\alpha$  secretion ( $1490.99 \pm 633.53$  pg/mL, mean  $\pm$  SD,  $n = 7$ ;  $p = 0.02$ ). The concentration of IFN- $\alpha$  did not change when poly(I:C)-electroporated U-937 cells were cocultured with NK cells and/or DC. As anticipated from our previous results [78], stimulation of NK cells with IFN- $\alpha$ -secreting poly(I:C)-electroporated U-937 cells, in contrast to K562 cells (that do not secrete IFN- $\alpha$  upon poly(I:C) electroporation), led to a significant IFN- $\gamma$  secretion ( $p = 0.02$ ; figure 5). In three-party cocultures consisting of K562 cells, also no IFN- $\gamma$  was detected. Addition of DC to NK cell:U-937 poly(I:C)-electroporated cocultures negatively influenced the IFN- $\gamma$  concentration ( $p = 0.05$ ; figure 5), however it remained significantly higher compared to mock-electroporated conditions ( $p = 0.02$ ; figure 5).

#### Relations between cytotoxicity, phagocytosis and cytokine secretion

Both killing by NK cells and phagocytosis by DC are significantly improved when AML cells are electroporated with poly(I:C). Focusing on the effect of poly(I:C) electroporation, we looked at the difference of killing and phagocytosis between mock- and poly(I:C)-electroporated tumor cells, depicted as  $\Delta$  killing (% killing of poly(I:C)-electroporated tumor cells - % killing of

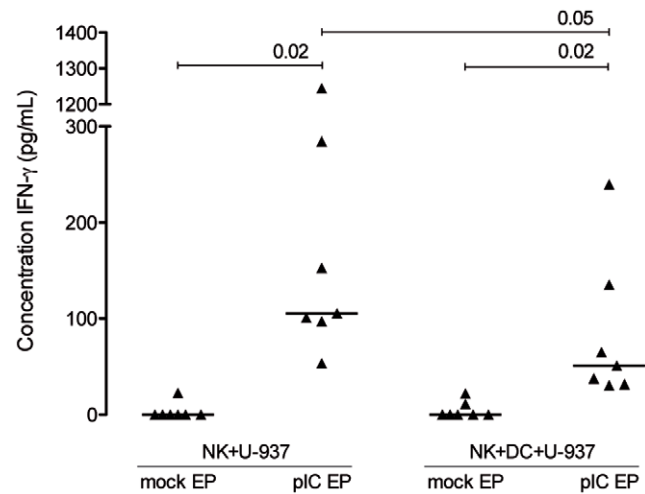

**Figure 5. Release of NK cell IFN- $\gamma$  upon stimulation with poly(I:C)-electroporated U-937 cells.** Concentration of IFN- $\gamma$  secreted by NK cells in two- and three-party cell cultures. Cocultures were held overnight at a 1:1 NK:U-937 or a 1:1:1 NK:DC:U-937 cell ratio. Horizontal lines represent median values for 7 donors. Differences are statistically significant if  $p < 0.05$ . Abbreviations: mock EP, electroporated without poly(I:C); pI:C EP, electroporated with poly(I:C). doi:10.1371/journal.pone.0020952.g005

mock-electroporated tumor cells) and  $\Delta$  phagocytosis (% phagocytosis of poly(I:C)-electroporated tumor cells - % phagocytosis of mock-electroporated tumor cells). Comparing the killing capacity in NK:tumor cell cocultures with the phagocytic capacity in DC:tumor cell cocultures, we observed a significant positive correlation for the U-937 cell line ( $r = 0.89$ ,  $p = 0.03$ ; figure 6A), but not for K562 cells ( $r = -0.67$ ,  $p = 0.23$ ). Interestingly, we also demonstrate correlations with reference to the effect of poly(I:C) electroporation of the U-937 cell line and the cytokines IFN- $\alpha$  and IFN- $\gamma$ . A positive correlation was found between the poly(I:C)-induced enhanced killing of U-937 cells by NK cells and the concentration of IFN- $\alpha$  secreted by U-937 cells ( $r = 0.71$ ,  $p = 0.14$ ; figure 6D). The IFN- $\alpha$  concentration was also found to be positively correlated with the improved uptake of U-937 cells by DC upon poly(I:C) electroporation ( $r = 0.89$ ,  $p = 0.03$ ; figure 6C). With regard to the IFN- $\gamma$  concentration, detected in cocultures with NK cells and poly(I:C)-electroporated U-937 cells, we demonstrate a positive relationship with the improved killing in NK cell:tumor cell cocultures ( $r = 0.60$ ,  $p = 0.24$ ) and with the improved uptake of U-937 cells in NK cell:DC:tumor cell cocultures ( $r = 0.77$ ,  $p = 0.10$ ; data not shown). Finally, the concentrations IFN- $\alpha$  and IFN- $\gamma$  found in cocultures of NK cells and poly(I:C)-electroporated U-937 cells are strongly correlated ( $r = 0.93$ ,  $p = 0.007$ ; figure 6B).

#### Discussion

We recently showed that human AML cells in response to electroporation with the synthetic dsRNA poly(I:C) enhance their capacity to act on DC and NK cells. AML cells become highly susceptible to apoptosis and subsequently secrete marked amounts of IFN- $\alpha$  [53,78]. Stimulation of immature DC with poly(I:C)-electroporated AML cells results in maturation of DC as evidenced by an increased expression of MHC and costimulatory molecules, production of proinflammatory cytokines and an increase of Th1-polarizing capacity [53]. Through secretion of IFN- $\alpha$ , these tumor cells are capable of triggering NK cells to secrete substantial

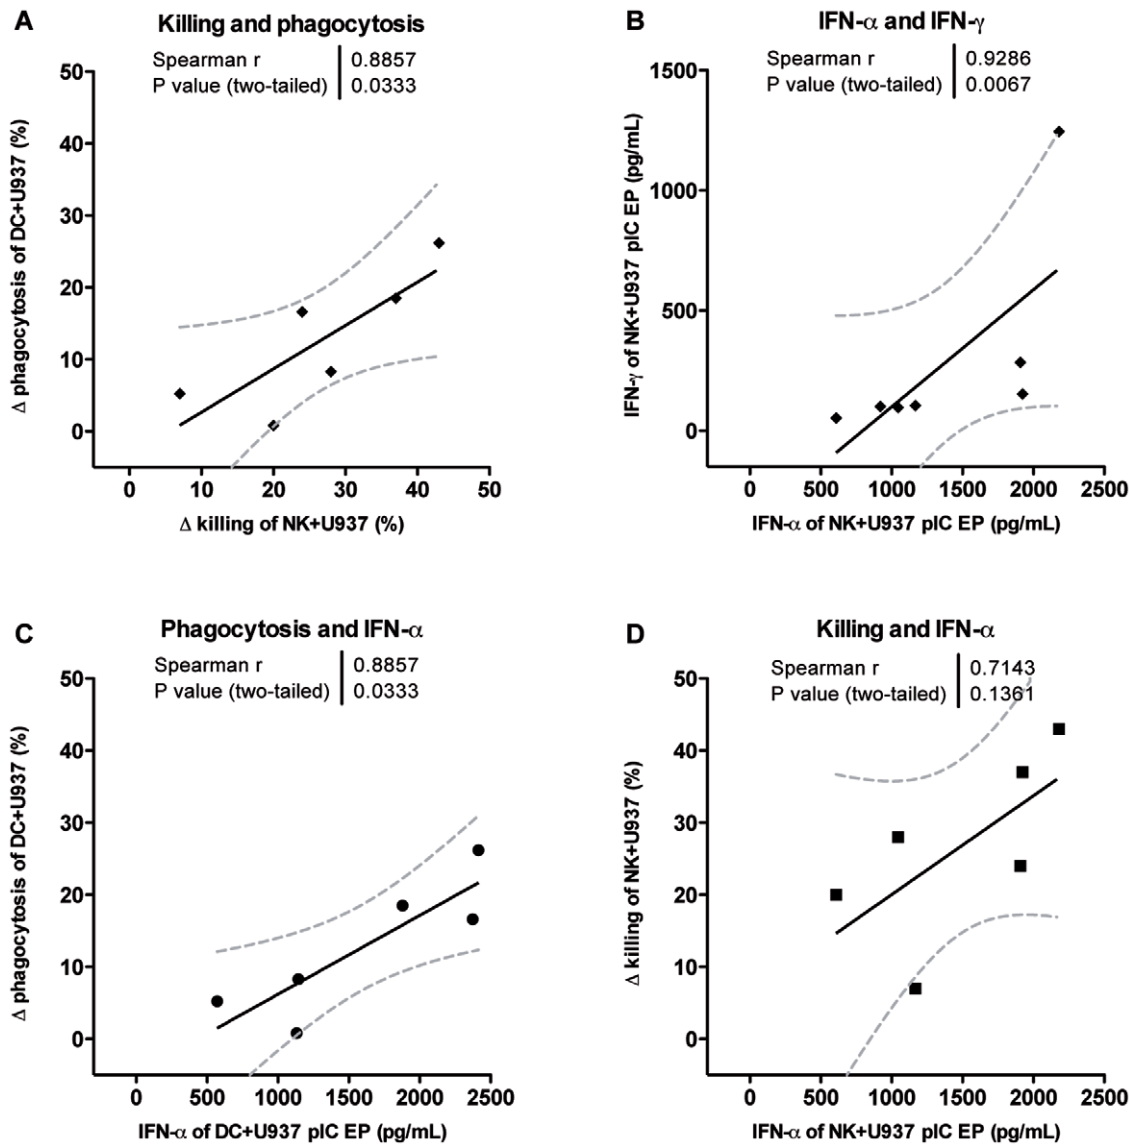

**Figure 6. Correlations of functional properties of NK cells and DC regarding poly(I:C) electroporation of the U-937 cell line.** (A) Positive correlation between the effect of poly(I:C) electroporation of U-937 cells on the NK cell killing capacity and the DC phagocytic function, expressed as the difference ( $\Delta$ ) in functions between mock- and poly(I:C)-electroporated U-937 cells. (B) The concentrations IFN- $\alpha$  and IFN- $\gamma$  in supernatant of NK cell:U-937 poly(I:C)-electroporated cocultures are strongly correlated. The improved (C) phagocytosis by immature DC and (D) killing by NK cells are in positive relation with the concentration IFN- $\alpha$  secreted by poly(I:C)-electroporated U-937 cells. Spearman rank correlations were calculated for defined functions. Abbreviations: mock EP, electroporated without poly(I:C); pIC EP, electroporated with poly(I:C);  $\Delta$  killing = % killing of poly(I:C)-electroporated tumor cells - % killing of mock-electroporated tumor cells;  $\Delta$  phagocytosis = % phagocytosis of poly(I:C)-electroporated tumor cells - % phagocytosis of mock-electroporated tumor cells. doi:10.1371/journal.pone.0020952.g006

amounts of IFN- $\gamma$ , without the need of additional triggering signals [78]. Together, these data signify that mimicking viral infection of AML tumor cells through introduction of dsRNA in the cytosol by poly(I:C) electroporation, leads to a strong improvement of tumor cell immunogenicity and may provide a local DC- and NK cell-stimulating environment. To further invigorate the potential of these immunogenic tumor cells, we explored the effect of poly(I:C) electroporation of AML cells on the killing capacity of NK cells and the phagocytic potential of DC.

Here, we demonstrate that through electroporation with poly(I:C), AML cell lines become highly susceptible to NK cell-mediated killing and phagocytosis by immature DC. Interestingly, NK cells are capable of killing poly(I:C)-electroporated U-937 cells

to the same extent as the classical NK-sensitive K562 cell line, despite the high expression of MHC class I molecules on U-937 cells which is known to counteract NK cell-mediated killing under normal circumstances. Noteworthy, the magnitudes of killing by purified NK cells in this study, at an E:T cell ratio of 1:1, have been achieved in the past mostly at higher E:T ratio's and/or in the presence of NK cell activating signals (e.g. maintenance concentration of IL-2, polyclonally activated NK cells). The presence of IFN- $\alpha$  secreted by the tumor cells could support the hypothesis of higher NK cell cytotoxicity and better internalization by DC. Type I IFNs can exert both direct effects on tumor cells and indirect effects on host immune cells that play a central role in the overall anti-tumor response [79]. IFN- $\alpha$  is a known modulator of cytotoxicity and has

been shown to stimulate cross-presentation of tumor antigens upon internalization by DC [80,81]. In line with these observations, we could demonstrate a positive correlation between IFN- $\alpha$  secretion following poly(I:C) treatment of U-937 cells and both NK cell-mediated killing and phagocytosis by DC. In addition, the amount of IFN- $\gamma$  detected in cocultures of NK cells and poly(I:C)-electroporated U-937 cells strongly correlated with the concentration of IFN- $\alpha$ , which may be the result of a direct immunostimulatory action of IFN- $\alpha$  on the IFN- $\gamma$  secretory capacity of NK cells. Finally, we also observed a strong correlation between the enhanced NK cell-mediated cytotoxicity and the improved uptake of U-937 cells by DC. In contrast to U-937 cells, K562 cells are unable to secrete IFN- $\alpha$  upon poly(I:C) electroporation and subsequently are powerless to trigger IFN- $\gamma$  release from NK cells. Nevertheless, we found that poly(I:C)-electroporated K562 cells are still more susceptible to NK cell cytotoxicity and to uptake by DC as compared to their untransfected counterparts. This finding argues against a direct role for IFN- $\alpha$  in potentiating NK cell-mediated killing of tumor cells following poly(I:C) electroporation. This is in line with other studies [82–84] demonstrating an IFN- $\alpha$  independent improvement of NK cell-mediated lysis of specific tumor cells. Based on previous studies from our laboratory, similar conclusions can be anticipated for the role of IFN- $\alpha$  in enhancing tumor cell uptake by DC [53] and in stimulating IFN- $\gamma$  release from NK cells [78]. Neither improvement of phagocytosis, nor IFN- $\gamma$  secretion by NK cells was observed following poly(I:C) electroporation of the promyelocytic leukemic cell line NB-4, despite the potent induction of IFN- $\alpha$ . These data indicate that the pro-immunogenic effects of poly(I:C) electroporation can evolve independent of IFN- $\alpha$ .

Taken together, our results provide further evidence that poly(I:C) could find application as a potent immunostimulatory adjuvant that may help overcoming resistance to tumor cell killing by improving NK cell-mediated cytotoxicity. In addition, we show that poly(I:C) treatment of tumor cells results in improved phagocytosis of tumor cells by DC, which may ultimately lead to improved tumor antigen presentation by DC and stimulation of specific T cells. Further research is needed to unravel the mechanisms used by DC and NK cells involved in these phenomena. Paths to explore include the expression upon poly(I:C) electroporation of several ‘eat me’ signals (e.g. phosphatidylserine, calreticulin, heat-shock proteins, high-mobility group box-A protein), that are emitted during immunogenic cell death to facilitate their recognition and phagocytosis by neighbouring immune cells [1,5,13]. Analysis of the expression of the activating receptor NKG2D on NK cells and its ligands (MHC class I chain-related (MIC) A/B and UL16 binding proteins (ULBPs)), which are down-regulated or absent on AML cells [32,44–46], could also provide a possible explanation for the improved sensitivity towards NK cells. Finally, mapping the overall cytokine profile of dsRNA-modified tumor cells cocultured with DC and NK cells would be of essential value to further dissect the mechanisms of action.

Arising from the observation that poly(I:C)-loaded tumor cells are both killed and phagocytosed more efficiently, the potential bidirectional cross-talk between NK cells and autologous DC was investigated in three-party cocultures. We hypothesized that improved tumor cell killing by NK cells and/or the release of both IFN- $\alpha$  and IFN- $\gamma$  (two important phagocyte-stimulating factors), could provide immature DC with even more tumor cell material to be internalized. However, the presence of NK cells (for both K562 and U-937) and/or IFN- $\alpha$  and IFN- $\gamma$  (for U-937 only), did not further improve the phagocytosis of poly(I:C)-electroporated tumor cells. Vice versa, several studies have shown that DC are capable of augmenting the cytotoxic function of NK cells,

putting forward an important pathway of stimulating innate anti-tumor effects. DC-mediated NK cell activation was shown to be cell contact dependent and to rely on defined stimuli [2]. Basically, cytolytic activity was augmented if NK cells were cultured with DC after exposure to various activation/maturation signals such as TLR-dependent microbial stimuli [85–88], virally infected tumor cells [89,90] or immune stimulating cytokine cocktails [86,91–93]. In line with these observations, we showed that monocyte-derived immature DC further enhanced the killing of K562 cells, under the condition that these tumor cells were upfront electroporated with poly(I:C). This effect occurred independent of IFN- $\alpha$ , since no IFN- $\alpha$  was detected in the supernatants of these cocultures, as described earlier. Based on previous reports about NK cell-mediated killing of immature DC [42,94–99], we also checked for DC viability in the different cocultures. After overnight culture with tumor cells and/or NK cells, we could not detect any differences in DC viability compared to unstimulated DC (not shown), ruling out killing of DC.

In addition to potentiating the NK cell cytolytic function, it is described that DC may trigger the release of IFN- $\gamma$  from NK cells [65,88–90,100–103]. In this study, no IFN- $\gamma$  was detected in the supernatants of three-party cocultures containing the K562 cell line. Moreover, high IFN- $\gamma$  concentration in conditions with IFN- $\alpha$ -secreting poly(I:C)-electroporated U-937 cells, was significantly lowered when DC were added to the coculture. In a study by Bontkes et al [100], both the IFN- $\gamma$  production as well as the cytolytic response towards K562 cells was significantly increased after stimulation with IL-12- and/or IL-18-secreting DC (through electroporation with IL-12 and IL-18 mRNA). We did not detect IL-12 and IL-18 in these culture supernatants (not shown), which would be in support of the absence of IFN- $\gamma$  in these three-party conditions. This suggests that additional mechanisms may be responsible for the improved killing of poly(I:C)-electroporated K562 cells in the presence of DC, but the exact pathways underlying this interaction remain to be uncovered.

Regarding the scope of reaching multiple immune cells to improve anti-tumor efficacy, the activation of DC and NK cells is an attractive modality for cancer immunotherapy. The key to effective ASI relies on the creation of optimal recognition and ensuing communication between the tumor and immune cells in order to obtain a sustained anti-tumor response. In summary, our recent findings show that mimicking viral infection of AML cells through transfection of dsRNA by electroporation with poly(I:C) improves their recognition by both DC and NK cells. Transfected tumor cells are able to activate DC and NK cell functions and stimulate NK-DC cross-talk in terms of tumor cell killing. This dual action on DC and NK cell immunity may provide a way to overcome immune evasion mechanisms by leukemic tumor cells. These data strongly support the use of poly(I:C) as a cancer vaccine component and provide a framework for the generation of anti-tumor immunity against low/non immunogenic tumor cells. Understanding the mechanisms that cause these observations will provide insight into the future optimization and development of novel vaccination regimens.

## Acknowledgments

The authors wish to thank Dr. Kristien Wouters (Antwerp University Hospital, Department of Scientific Coordination) for guidance in the statistical analysis.

## Author Contributions

Conceived and designed the experiments: EL. Performed the experiments: EL SA. Analyzed the data: EL. Wrote the paper: EL SA ELJMS VFIVT ZNB.



## References

- Zitvogel L, Apetoh L, Ghiringhelli F, Kroemer G (2008) Immunological aspects of cancer chemotherapy. *Nat Rev Immunol* 8: 59–73.
- Degli-Esposti MA, Smyth MJ (2005) Close encounters of different kinds: dendritic cells and NK cells take centre stage. *Nat Rev Immunol* 5: 112–124.
- Ferlazzo G, Munz C (2009) Dendritic cell interactions with NK cells from different tissues. *J Clin Immunol* 29: 265–273.
- Walzer T, Dalod M, Robbins SH, Zitvogel L, Vivier E (2005) Natural-killer cells and dendritic cells: "l'union fait la force". *Blood* 106: 2252–2258.
- Green DR, Ferguson T, Zitvogel L, Kroemer G (2009) Immunogenic and tolerogenic cell death. *Nat Rev Immunol* 9: 353–363.
- Albert ML, Sauter B, Bhardwaj N (1998) Dendritic cells acquire antigen from apoptotic cells and induce class I-restricted CTLs. *Nature* 392: 86–89.
- Lin ML, Zhan Y, Villadangos JA, Lew AM (2008) The cell biology of cross-presentation and the role of dendritic cell subsets. *Immunol Cell Biol* 86: 353–362.
- Gallucci S, Matzinger P (2001) Danger signals: SOS to the immune system. *Curr Opin Immunol* 13: 114–119.
- Malmberg KJ, Bryceson YT, Carlsten M, Andersson S, Bjorklund A, et al. (2008) NK cell-mediated targeting of human cancer and possibilities for new means of immunotherapy. *Cancer Immunol Immunother* 57: 1541–1552.
- Sutlu T, Alici E (2009) Natural killer cell-based immunotherapy in cancer: current insights and future prospects. *J Intern Med* 266: 154–181.
- Terme M, Ullrich E, Delahaye NF, Chaput N, Zitvogel L (2008) Natural killer cell-directed therapies: moving from unexpected results to successful strategies. *Nat Immunol* 9: 486–494.
- Strowig T, Brilot F, Munz C (2008) Noncytotoxic functions of NK cells: direct pathogen restriction and assistance to adaptive immunity. *J Immunol* 180: 7785–7791.
- Garg AD, Nowis D, Golab J, Vandenabeele P, Krysko DV, et al. (2010) Immunogenic cell death, DAMPs and anticancer therapeutics: an emerging amalgamation. *Biochim Biophys Acta* 1805: 53–71.
- Feng H, Zeng Y, Graner MW, Katsanis E (2002) Stressed apoptotic tumor cells stimulate dendritic cells and induce specific cytotoxic T cells. *Blood* 100: 4108–4115.
- Hoffmann TK, Meidenbauer N, Dworacki G, Kanaya H, Whiteside TL (2000) Generation of tumor-specific T-lymphocytes by cross-priming with human dendritic cells ingesting apoptotic tumor cells. *Cancer Res* 60: 3542–3549.
- Jongbloed SL, Kassianos AJ, McDonald KJ, Clark GJ, Ju X, et al. (2010) Human CD141+ (BDCA-3)+ dendritic cells (DCs) represent a unique myeloid DC subset that cross-presents necrotic cell antigens. *J Exp Med* 207: 1247–1260.
- Lee JJ, Foon KA, Mailliard RB, Muthuswamy R, Kalinski P (2008) Type 1-polarized dendritic cells loaded with autologous tumor are a potent immunogen against chronic lymphocytic leukemia. *J Leukoc Biol* 84: 319–325.
- Mochler MH, Zeidler M, Wilsberg V, Cornelis JJ, Woelfel T, et al. (2005) Parvovirus H-1-induced tumor cell death enhances human immune response in vitro via increased phagocytosis, maturation, and cross-presentation by dendritic cells. *Hum Gene Ther* 16: 996–1005.
- Rovere P, Vallinoto C, Bondanza A, Crosti MC, Rescigno M, et al. (1998) Bystander apoptosis triggers dendritic cell maturation and antigen-presenting function. *J Immunol* 161: 4467–4471.
- Schnurr M, Scholz C, Rothenfusser S, Galambos P, Dauer M, et al. (2002) Apoptotic pancreatic tumor cells are superior to cell lysates in promoting cross-priming of cytotoxic T cells and activate NK and gamma delta T cells. *Cancer Res* 62: 2347–2352.
- Spisek R, Charalambous A, Mazumder A, Vesole DH, Jagannath S, et al. (2007) Bortezomib enhances dendritic cell (DC)-mediated induction of immunity to human myeloma via exposure of cell surface heat shock protein 90 on dying tumor cells: therapeutic implications. *Blood* 109: 4839–4845.
- Spisek R, Chevallier P, Morineau N, Milpied N, Avet-Loiseau H, et al. (2002) Induction of leukemia-specific cytotoxic response by cross-presentation of late-apoptotic leukemic blasts by autologous dendritic cells of nonleukemic origin. *Cancer Res* 62: 2861–2868.
- Strome SE, Voss S, Wilcox R, Wakefield TL, Tamada K, et al. (2002) Strategies for antigen loading of dendritic cells to enhance the antitumor immune response. *Cancer Res* 62: 1884–1889.
- von Eeuw EM, Barrio MM, Furman D, Bianchini M, Levy EM, et al. (2007) Monocyte-derived dendritic cells loaded with a mixture of apoptotic/necrotic melanoma cells efficiently cross-present gp100 and MART-1 antigens to specific CD8(+) T lymphocytes. *J Transl Med* 5: 19.
- Fry TJ, Shand JL, Milliron M, Tasian SK, Mackall CL (2009) Antigen loading of DCs with irradiated apoptotic tumor cells induces improved anti-tumor immunity compared to other approaches. *Cancer Immunol Immunother* 58: 1257–1264.
- Henry F, Boisteau O, Bretaudeau L, Lieubeau B, Meflah K, et al. (1999) Antigen-presenting cells that phagocytose apoptotic tumor-derived cells are potent tumor vaccines. *Cancer Res* 59: 3329–3332.
- Ronchetti A, Rovere P, Iezzi G, Galati G, Heltai S, et al. (1999) Immunogenicity of apoptotic cells in vivo: role of antigen load, antigen-presenting cells, and cytokines. *J Immunol* 163: 130–136.
- Hallett WH, Ames E, Motarjemi M, Barao I, Shanker A, et al. (2008) Sensitization of tumor cells to NK cell-mediated killing by proteasome inhibition. *J Immunol* 180: 163–170.
- Lanier LL (2005) Missing self, NK cells, and The White Album. *J Immunol* 174: 6565.
- Kim MJ, Kim HB, Bae JH, Lee JW, Park SJ, et al. (2009) Sensitization of human K562 leukemic cells to TRAIL-induced apoptosis by inhibiting the DNA-PKcs/Akt-mediated cell survival pathway. *Biochem Pharmacol* 78: 573–582.
- Lundqvist A, Abrams SI, Schrupp DS, Alvarez G, Suffredini D, et al. (2006) Bortezomib and decapeptide sensitize tumors to tumor necrosis factor-related apoptosis-inducing ligand: a novel method to potentiate natural killer cell tumor cytotoxicity. *Cancer Res* 66: 7317–7325.
- Rohner A, Langenkamp U, Siegler U, Kalberer CP, Wodnar-Filipowicz A (2007) Differentiation-promoting drugs up-regulate NKG2D ligand expression and enhance the susceptibility of acute myeloid leukemia cells to natural killer cell-mediated lysis. *Leuk Res* 31: 1393–1402.
- Szczepanski MJ, Szajnik M, Welsh A, Foon KA, Whiteside TL, et al. (2010) Interleukin-15 enhances natural killer cell cytotoxicity in patients with acute myeloid leukemia by upregulating the activating NK cell receptors. *Cancer Immunol Immunother* 59: 73–79.
- Koh CY, Blazar BR, George T, Welniak LA, Capitini CM, et al. (2001) Augmentation of antitumor effects by NK cell inhibitory receptor blockade in vitro and in vivo. *Blood* 97: 3132–3137.
- Sheridan C (2006) First-in-class cancer therapeutic to stimulate natural killer cells. *Nat Biotechnol* 24: 597.
- Triulzi C, Vertuani S, Curcio C, Antognoli A, Scibt J, et al. (2010) Antibody-dependent natural killer cell-mediated cytotoxicity engendered by a kinase-inactive human HER2 adenovirus-based vaccination mediates resistance to breast tumors. *Cancer Res* 70: 7431–7441.
- Wu L, Parton A, Lu L, Adams M, Schafer P, et al. (2011) Lenalidomide enhances antibody-dependent cellular cytotoxicity of solid tumor cells in vitro: influence of host immune and tumor markers. *Cancer Immunol Immunother*.
- Smits EL, Berneman ZN, Van Tendeloo VF (2009) Immunotherapy of acute myeloid leukemia: current approaches. *Oncologist* 14: 240–252.
- Barrett AJ, Le Blanc K (2010) Immunotherapy prospects for acute myeloid leukaemia. *Clin Exp Immunol* 161: 223–232.
- Costello RT, Sivori S, Marcenaro E, Lafage-Pochitaloff M, Mozziconacci MJ, et al. (2002) Defective expression and function of natural killer cell-triggering receptors in patients with acute myeloid leukemia. *Blood* 99: 3661–3667.
- Fauriat C, Just-Landi S, Mallet F, Arnoulet C, Sainy D, et al. (2007) Deficient expression of NCR in NK cells from acute myeloid leukemia: Evolution during leukemia treatment and impact of leukemia cells in NCRdull phenotype induction. *Blood* 109: 323–330.
- Fauriat C, Moretta A, Olive D, Costello RT (2005) Defective killing of dendritic cells by autologous natural killer cells from acute myeloid leukemia patients. *Blood* 106: 2186–2188.
- Costello RT, Fauriat C, Sivori S, Marcenaro E, Olive D (2004) NK cells: innate immunity against hematological malignancies? *Trends Immunol* 25: 328–333.
- Verheyden S, Demanet C (2008) NK cell receptors and their ligands in leukemia. *Leukemia* 22: 249–257.
- Nowbakht P, Ionescu MC, Rohner A, Kalberer CP, Rossy E, et al. (2005) Ligands for natural killer cell-activating receptors are expressed upon the maturation of normal myelomonocytic cells but at low levels in acute myeloid leukemias. *Blood* 105: 3615–3622.
- Salih HR, Antropius H, Gieseke F, Lutz SZ, Kanz L, et al. (2003) Functional expression and release of ligands for the activating immunoreceptor NKG2D in leukemia. *Blood* 102: 1389–1396.
- McCartney S, Vermi W, Gilfillan S, Cella M, Murphy TL, et al. (2009) Distinct and complementary functions of MDA5 and TLR3 in poly(I:C)-mediated activation of mouse NK cells. *J Exp Med* 206: 2967–2976.
- Akira S, Takeda K (2004) Toll-like receptor signalling. *Nat Rev Immunol* 4: 499–511.
- Smits EL, Cools N, Lion E, Van Camp K, Ponsaerts P, et al. (2010) The Toll-like receptor 7/8 agonist resiquimod greatly increases the immunostimulatory capacity of human acute myeloid leukemia cells. *Cancer Immunol Immunother* 59: 35–46.
- Matsumoto M, Seya T (2008) TLR3: interferon induction by double-stranded RNA including poly(I:C). *Adv Drug Deliv Rev* 60: 805–812.
- Salaun B, Coste I, Risoan MC, Lebecque SJ, Renno T (2006) TLR3 can directly trigger apoptosis in human cancer cells. *J Immunol* 176: 4894–4901.
- Salem ML, El-Naggar SA, Kadima A, Gillanders WE, Cole DJ (2006) The adjuvant effects of the toll-like receptor 3 ligand polyinosinic-cytidylic acid poly(I:C) on antigen-specific CD8+ T cell responses are partially dependent on NK cells with the induction of a beneficial cytokine milieu. *Vaccine* 24: 5119–5132.
- Smits EL, Ponsaerts P, Van de Velde AL, Van Driessche A, Cools N, et al. (2007) Proinflammatory response of human leukemic cells to dsRNA transfection linked to activation of dendritic cells. *Leukemia* 21: 1691–1699.
- Girart MV, Fuertes MB, Domaioca CI, Rossi LE, Zwierner NW (2007) Engagement of TLR3, TLR7, and NKG2D regulate IFN-gamma secretion but

- not NKG2D-mediated cytotoxicity by human NK cells stimulated with suboptimal doses of IL-12. *J Immunol* 179: 3472–3479.
55. Akazawa T, Ebihara T, Okuno M, Okuda Y, Shingai M, et al. (2007) Antitumor NK activation induced by the Toll-like receptor 3-TICAM-1 (TRIF) pathway in myeloid dendritic cells. *Proc Natl Acad Sci U S A* 104: 252–257.
  56. Lauzon NM, Mian F, MacKenzie R, Ashkar AA (2006) The direct effects of Toll-like receptor ligands on human NK cell cytokine production and cytotoxicity. *Cell Immunol* 241: 102–112.
  57. Perrot I, Deauevieu F, Massacrier C, Hughes N, Garrone P, et al. (2010) TLR3 and Rig-like receptor on myeloid dendritic cells and Rig-like receptor on human NK cells are both mandatory for production of IFN-gamma in response to double-stranded RNA. *J Immunol* 185: 2080–2088.
  58. Pisegna S, Pirozzi G, Piccoli M, Frati L, Santoni A, et al. (2004) p38 MAPK activation controls the TLR3-mediated up-regulation of cytotoxicity and cytokine production in human NK cells. *Blood* 104: 4157–4164.
  59. Schmidt KN, Leung B, Kwong M, Zarembler KA, Satyal S, et al. (2004) APC-independent activation of NK cells by the Toll-like receptor 3 agonist double-stranded RNA. *J Immunol* 172: 138–143.
  60. Sivori S, Falco M, Della Chiesa M, Carlomagno S, Vitale M, et al. (2004) CpG and double-stranded RNA trigger human NK cells by Toll-like receptors: induction of cytokine release and cytotoxicity against tumors and dendritic cells. *Proc Natl Acad Sci U S A* 101: 10116–10121.
  61. Adams M, Navabi H, Jasani B, Man S, Fiander A, et al. (2003) Dendritic cell (DC) based therapy for cervical cancer: use of DC pulsed with tumour lysate and matured with a novel synthetic clinically non-toxic double stranded RNA analogue poly [I]:poly [C(12)U] (Ampligen R). *Vaccine* 21: 787–790.
  62. Benwell RK, Hruska JE, Fritsche KL, Lee DR (2010) Double stranded RNA relative to other TLR ligand-activated dendritic cells induce extremely polarized human Th1 responses. *Cell Immunol* 264: 119–126.
  63. Boullart AC, Aarntzen EH, Verdijk P, Jacobs JF, Schuurhuis DH, et al. (2008) Maturation of monocyte-derived dendritic cells with Toll-like receptor 3 and 7/8 ligands combined with prostaglandin E2 results in high interleukin-12 production and cell migration. *Cancer Immunol Immunother* 57: 1589–1597.
  64. Lore K, Betts MR, Brechley JM, Kuruppu J, Khojasteh S, et al. (2003) Toll-like receptor ligands modulate dendritic cells to augment cytomegalovirus- and HIV-1-specific T cell responses. *J Immunol* 171: 4320–4328.
  65. Strowig T, Brilot F, Arrey F, Bougras G, Thomas D, et al. (2008) Tonsillar NK cells restrict B cell transformation by the Epstein-Barr virus via IFN-gamma. *PLoS Pathog* 4: e27.
  66. Verdijk RM, Mutis T, Esendam B, Kamp J, Melief CJ, et al. (1999) Polyriboinosinic polyribocytidylic acid (poly(I:C)) induces stable maturation of functionally active human dendritic cells. *J Immunol* 163: 57–61.
  67. Moretta A, Marcenaro E, Parolini S, Ferlazzo G, Moretta L (2003) NK cells at the interface between innate and adaptive immunity. *Cell Death Differ* 15: 226–233.
  68. Zanoni I, Granucci F, Foti M, Ricciardi-Castagnoli P (2007) Self-tolerance, dendritic cell (DC)-mediated activation and tissue distribution of natural killer (NK) cells. *Immunol Lett* 110: 6–17.
  69. Datta SK, Redecke V, Prilliman KR, Takabayashi K, Corr M, et al. (2003) A subset of Toll-like receptor ligands induces cross-presentation by bone marrow-derived dendritic cells. *J Immunol* 170: 4102–4110.
  70. Durand V, Wong SY, Tough DF, Le Bon A (2004) Shaping of adaptive immune responses to soluble proteins by TLR agonists: a role for IFN-alpha/beta. *Immunol Cell Biol* 82: 596–602.
  71. Fujimoto C, Nakagawa Y, Ohara K, Takahashi H (2004) Polyriboinosinic polyribocytidylic acid [poly(I:C)]/TLR3 signaling allows class I processing of exogenous protein and induction of HIV-specific CD8+ cytotoxic T lymphocytes. *Int Immunol* 16: 55–63.
  72. Cui Z, Le UM, Qiu F, Shaker DS (2007) Learning from viruses: the necrotic bodies of tumor cells with intracellular synthetic dsRNA induced strong antitumor immune responses. *Pharm Res* 24: 1645–1652.
  73. Cui Z, Qiu F (2006) Synthetic double-stranded RNA poly(I:C) as a potent peptide vaccine adjuvant: therapeutic activity against human cervical cancer in a rodent model. *Cancer Immunol Immunother* 55: 1267–1279.
  74. Salio M, Cerundolo V (2005) Viral immunity: cross-priming with the help of TLR3. *Curr Biol* 15: R336–339.
  75. Schulz O, Diebold SS, Chen M, Naslund TI, Nolte MA, et al. (2005) Toll-like receptor 3 promotes cross-priming to virus-infected cells. *Nature* 433: 887–892.
  76. Freta D, Yu CI, Klechevsky E, Flammar AL, Zurawski G, et al. (2009) Influenza virus and poly(I:C) inhibit MHC class I-restricted presentation of cell-associated antigens derived from infected dead cells captured by human dendritic cells. *J Immunol* 182: 2766–2776.
  77. McBride S, Hoebe K, Georget P, Janssen E (2006) Cell-associated double-stranded RNA enhances antitumor activity through the production of type I IFN. *J Immunol* 177: 6122–6128.
  78. Lion E, Smits EL, Berneman ZN, Van Tendeloo VF (2009) Acute myeloid leukemic cell lines loaded with synthetic dsRNA trigger IFN-gamma secretion by human NK cells. *Leuk Res* 33: 539–546.
  79. Smyth MJ, Cretney E, Kershaw MH, Hayakawa Y (2004) Cytokines in cancer immunity and immunotherapy. *Immunol Rev* 202: 275–293.
  80. Pfeffer LM, Dinarello CA, Herberman RB, Williams BR, Borden EC, et al. (1998) Biological properties of recombinant alpha-interferons: 40th anniversary of the discovery of interferons. *Cancer Res* 58: 2489–2499.
  81. Le Bon A, Tough DF (2008) Type I interferon as a stimulus for cross-priming. *Cytokine Growth Factor Rev* 19: 33–40.
  82. Fernandez NC, Lozier A, Flament C, Ricciardi-Castagnoli P, Bellet D, et al. (1999) Dendritic cells directly trigger NK cell functions: cross-talk relevant in innate anti-tumor immune responses in vivo. *Nat Med* 5: 405–411.
  83. Mailliard RB, Son YI, Redlinger R, Coates PT, Giermasz A, et al. (2003) Dendritic cells mediate NK cell help for Th1 and CTL responses: two-signal requirement for the induction of NK cell helper function. *J Immunol* 171: 2366–2373.
  84. Romagnani C, Della Chiesa M, Kohler S, Moewes B, Radbruch A, et al. (2005) Activation of human NK cells by plasmacytoid dendritic cells and its modulation by CD4+ T helper cells and CD4+ CD25hi T regulatory cells. *Eur J Immunol* 35: 2452–2458.
  85. Fernandez NC, Flament C, Crepeau F, Angevin E, Vivier E, et al. (2002) Dendritic cells (DC) promote natural killer (NK) cell functions: dynamics of the human DC/NK cell cross talk. *Eur Cytokine Netw* 13: 17–27.
  86. Gerosa F, Baldani-Guerra B, Nisii C, Marchesini V, Carra G, et al. (2002) Reciprocal activating interaction between natural killer cells and dendritic cells. *J Exp Med* 195: 327–333.
  87. Gerosa F, Gobbi A, Zorzi P, Burg S, Briere F, et al. (2005) The reciprocal interaction of NK cells with plasmacytoid or myeloid dendritic cells profoundly affects innate resistance functions. *J Immunol* 174: 727–734.
  88. Wehner R, Lobel B, Bornhauser M, Schakel K, Cartellieri M, et al. (2009) Reciprocal activating interaction between 6-sulfo LacNAc+ dendritic cells and NK cells. *Int J Cancer* 124: 358–366.
  89. Prestwich RJ, Errington F, Steele LP, Ilett EJ, Morgan RS, et al. (2009) Reciprocal human dendritic cell-natural killer cell interactions induce antitumor activity following tumor cell infection by oncolytic reovirus. *J Immunol* 183: 4312–4321.
  90. Vujanovic L, Szymkowski DE, Alber S, Watkins SC, Vujanovic NL, et al. (2010) Virally infected and matured human dendritic cells activate natural killer cells via cooperative activity of plasma membrane-bound TNF and IL-15. *Blood* 116: 575–583.
  91. Yu Y, Hagihara M, Ando K, Gansuud B, Matsuzawa H, et al. (2001) Enhancement of human cord blood CD34+ cell-derived NK cell cytotoxicity by dendritic cells. *J Immunol* 166: 1590–1600.
  92. Ferlazzo G, Tsang ML, Moretta L, Melioli G, Steinman RM, et al. (2002) Human dendritic cells activate resting natural killer (NK) cells and are recognized via the Nkp30 receptor by activated NK cells. *J Exp Med* 195: 343–351.
  93. Munz C, Dao T, Ferlazzo G, de Cos MA, Goodman K, et al. (2005) Mature myeloid dendritic cell subsets have distinct roles for activation and viability of circulating human natural killer cells. *Blood* 105: 266–273.
  94. Ferlazzo G, Morandi B, D'Agostino A, Meazza R, Melioli G, et al. (2003) The interaction between NK cells and dendritic cells in bacterial infections results in rapid induction of NK cell activation and in the lysis of uninfected dendritic cells. *Eur J Immunol* 33: 306–313.
  95. Piccioli D, Sbrana S, Melandri E, Valiante NM (2002) Contact-dependent stimulation and inhibition of dendritic cells by natural killer cells. *J Exp Med* 195: 335–341.
  96. Carbone E, Terrazzano G, Ruggiero G, Zanzi D, Ottaiano A, et al. (1999) Recognition of autologous dendritic cells by human NK cells. *Eur J Immunol* 29: 4022–4029.
  97. Marcenaro E, Della Chiesa M, Bellora F, Parolini S, Millo R, et al. (2005) IL-12 or IL-4 prime human NK cells to mediate functionally divergent interactions with dendritic cells or tumors. *J Immunol* 174: 3992–3998.
  98. Pietra G, Romagnani C, Mazzarino P, Millo E, Moretta L, et al. (2003) Comparative analysis of NK- or NK-CTL-mediated lysis of immature or mature autologous dendritic cells. *Eur J Immunol* 33: 3427–3432.
  99. Wilson JL, Hefler LC, Charo J, Scheynius A, Bejarano MT, et al. (1999) Targeting of human dendritic cells by autologous NK cells. *J Immunol* 163: 6365–6370.
  100. Bontkes HJ, Kramer D, Ruizendaal JJ, Meijer CJ, Hooijberg E (2008) Tumor associated antigen and interleukin-12 mRNA transfected dendritic cells enhance effector function of natural killer cells and antigen specific T-cells. *Clin Immunol* 127: 375–384.
  101. Ferlazzo G, Pack M, Thomas D, Paludan C, Schmid D, et al. (2004) Distinct roles of IL-12 and IL-15 in human natural killer cell activation by dendritic cells from secondary lymphoid organs. *Proc Natl Acad Sci U S A* 101: 16606–16611.
  102. Zanoni I, Foti M, Ricciardi-Castagnoli P, Granucci F (2005) TLR-dependent activation stimuli associated with Th1 responses confer NK cell stimulatory capacity to mouse dendritic cells. *J Immunol* 175: 286–292.
  103. Kamath AT, Sheasby CE, Tough DF (2005) Dendritic cells and NK cells stimulate bystander T cell activation in response to TLR agonists through secretion of IFN-alpha beta and IFN-gamma. *J Immunol* 174: 767–776.
